# Supplementary material for: Activation of the PD-1/PD-L1 immune checkpoint confers tumor cell chemoresistance associated with increased metastasis
Source: PubMed Central journal article supplement (PMC4891140; doi:10.18632/oncotarget.7235), 2016-02-07
Supplement: oncotarget-07-10557-s001.pdf [file oncotarget-07-10557-s001.pdf]

## Activation of the PD-1/PD-L1 immune checkpoint confers tumor cell chemoresistance associated with increased metastasis

### Supplementary Material

**Supplementary Table 1.** Relative levels of ERK phosphorylation in MDA-MB-231 cells exposed to recombinant PD-1 (1 µg/ml) for up to 60 min. Numbers shown indicate the ratio of phospho-ERK : ERK densitometric values from three independent experiments. Fold increase relative to Time 0 is shown in brackets.

| <b>Time (min)</b> | <b>Experiment 1</b> | <b>Experiment 2</b> | <b>Experiment 3</b> |
|-------------------|---------------------|---------------------|---------------------|
| <b>0</b>          | 0.27<br>(1)         | 0.42<br>(1)         | 0.20<br>(1)         |
| <b>10</b>         | 0.76<br>(2.82)      | 0.44<br>(1.05)      | 0.33<br>(1.83)      |
| <b>20</b>         | 0.75<br>(2.79)      | 0.56<br>(1.33)      | 0.65<br>(2.43)      |
| <b>30</b>         | 0.71<br>(2.66)      | 0.77<br>(1.85)      | 0.83<br>(2.87)      |
| <b>60</b>         | 0.68<br>(2.55)      | 0.67<br>(1.61)      | 0.72<br>(2.58)      |

**Supplementary Table 2.** Relative levels of mTOR phosphorylation (Ser2448) in MDA-MB-231 cells exposed to recombinant PD-1 (1 µg/ml) for up to 60 min. Numbers shown indicate the ratio of phospho-mTOR:mTOR densitometric values from three independent experiments. Fold increase relative to Time 0 is shown in brackets.

| <b>Time (min)</b> | <b>Experiment 1</b> | <b>Experiment 2</b> | <b>Experiment 3</b> |
|-------------------|---------------------|---------------------|---------------------|
| <b>0</b>          | 0.81<br>(1)         | 0.48<br>(1)         | 0.01<br>(1)         |
| <b>10</b>         | 1.24<br>(1.53)      | 0.62<br>(1.29)      | 0.26<br>(38.51)     |
| <b>20</b>         | 0.71<br>(0.87)      | 0.58<br>(1.20)      | 0.30<br>(43.82)     |
| <b>30</b>         | 0.78<br>(0.96)      | 0.56<br>(1.17)      | 0.93<br>(135.39)    |
| <b>60</b>         | 0.76<br>(0.93)      | 0.42<br>(0.87)      | 0.65<br>(96.43)     |

**Supplementary Table 3.** Rag2<sup>-/-</sup>γc<sup>-/-</sup> mice treatment data. The table outlines each mouse used in the in-vivo immunodeficient mammary carcinoma study and the type of treatment and number of treatments that each mouse received. A complete study consisted of four cycles of treatment, and each cycle consisted of an antibody injection followed by doxorubicin or saline injection 24 h later.

| <b>Mouse Detail</b>                   | <b>Number of Treatment Cycles</b> |
|---------------------------------------|-----------------------------------|
| <b><u>IgG + Saline</u></b>            |                                   |
| Mouse #2                              | 4                                 |
| Mouse #6                              | 4                                 |
| Mouse #10                             | 4                                 |
| Mouse #14                             | 2                                 |
| Mouse #18                             | 3                                 |
| Average for group                     | 3.4                               |
| <b><u>Anti-PD-1 + Saline</u></b>      |                                   |
| Mouse #4                              | 4                                 |
| Mouse #8                              | 2                                 |
| Mouse #12                             | 2                                 |
| Mouse #16                             | 3                                 |
| Mouse #20                             | 1                                 |
| Average for group                     | 2.4                               |
| <b><u>IgG + Doxorubicin</u></b>       |                                   |
| Mouse #3                              | 3                                 |
| Mouse #7                              | 4                                 |
| Mouse #11                             | 1                                 |
| Mouse #15                             | 1                                 |
| Mouse #19                             | 4                                 |
| Average for group                     | 2.6                               |
| <b><u>Anti-PD-1 + Doxorubicin</u></b> |                                   |
| Mouse #1                              | 4                                 |
| Mouse #5                              | 4                                 |
| Mouse #9                              | 1                                 |
| Mouse #13                             | 2                                 |
| Mouse #17                             | 4                                 |
| Average for group                     | 3.0                               |

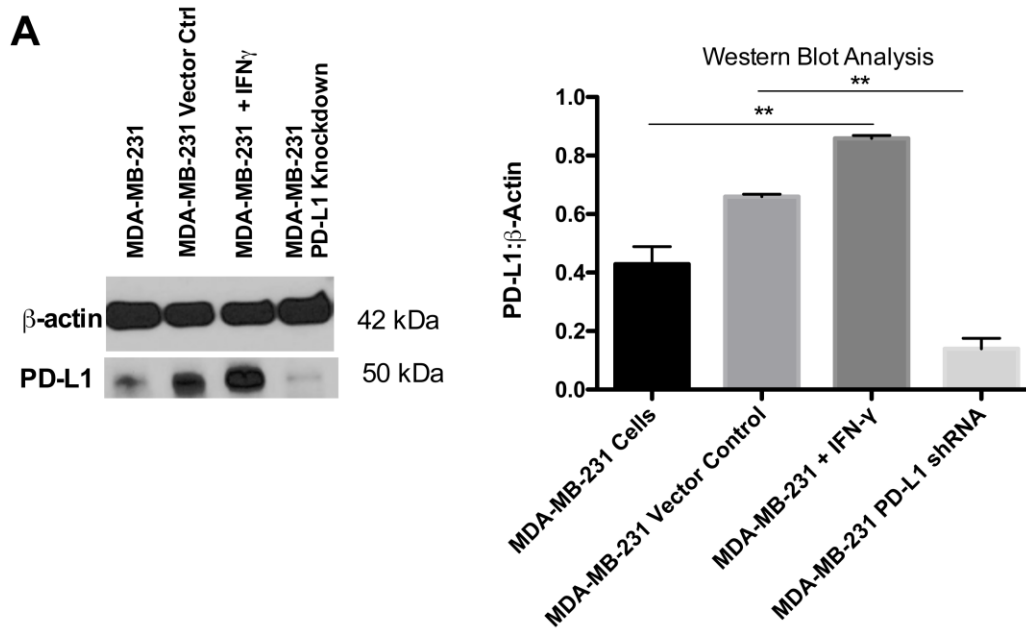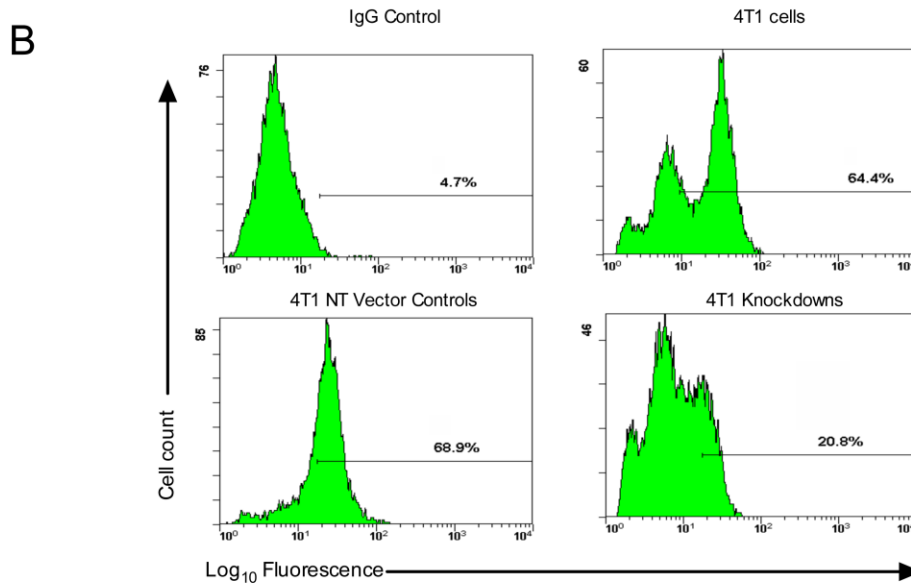

**Supplementary Figure 1. PD-L1 knockdown (KD) in MDA-MB-231 and 4T1 cells.** A, Western blot representation and quantitative densitometric analysis of PD-L1 protein levels in MDA-MB-231 cells treated under various conditions. Data for densitometric analysis were taken from three independent blots. B, Flow cytometric analysis showing surface PD-L1 expression on 4T1 cells treated with PD-L1 knockdown shRNA or non-

targeting (NT) control vector shRNA and stained with FITC-conjugated IgG control antibody or FITC-conjugated PD-L1 antibody. Following subtraction of background fluorescence of cells incubated with control IgG, 59.7% of control 4T1 cells expressed detectable levels of PD-L1. In contrast, only 16.1% of cells expressing PD-L1 knockdown shRNA (4T1 KD) had detectable surface PD-L1 levels. Compared with cells expressing non-targeting shRNA (4T1 NT Vector Controls; 64.2% of cells with detectable PD-L1) this represents a 75% decrease in surface PD-L1 levels.

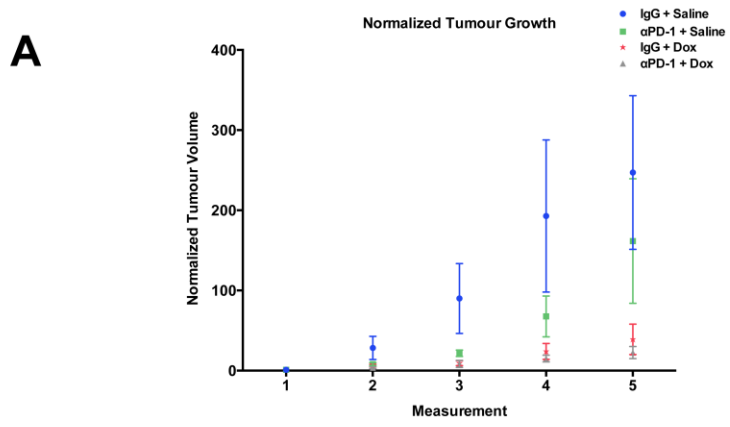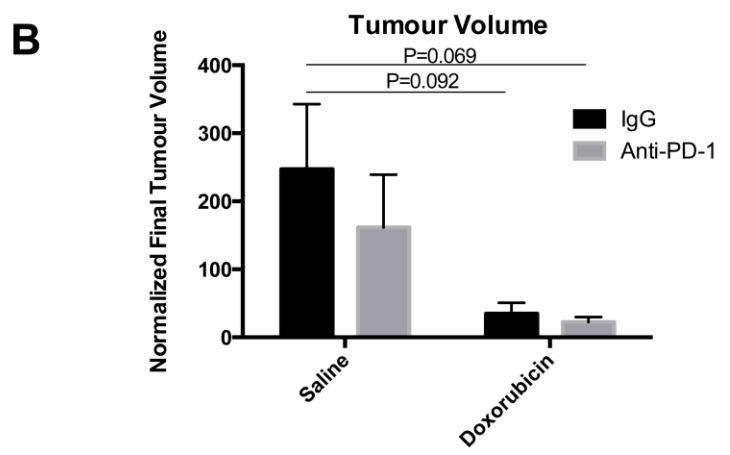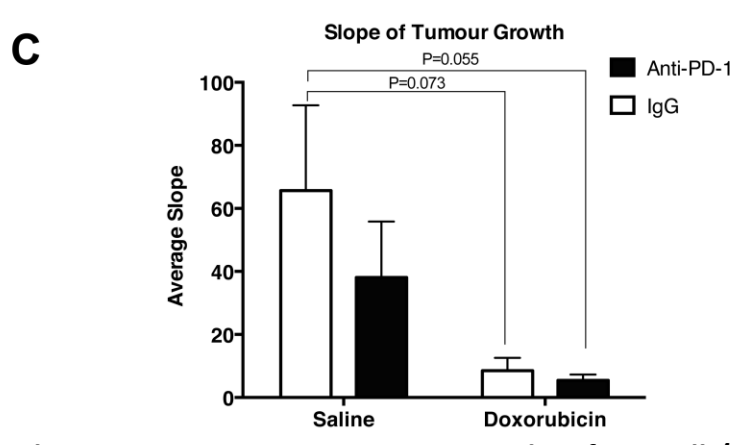

**Supplementary Figure 2. Primary tumour data from Balb/c mice treated with anti-PD-1 or doxorubicin in combination or alone.** A, Change in mean primary tumor volumes on each day of measurement. Measurements were taken at 2-3-day intervals following each antibody injection and on the day of sacrifice. Tumor volumes for each animal were normalized to the tumour volume on day one of treatment. B, Balb/c mice treated with anti-PD-1 + doxorubicin trended toward having smaller final tumour volumes compared to mice receiving IgG + saline. C, Tumors in mice treated with anti-PD-1 +

doxorubicin exhibited a trend toward a slower growth compared to those in mice receiving IgG + saline as indicated by the differences in the slopes of the growth curves ( $P=0.055$ ). Data in each graph were obtained from a single experiment consisting of 23 animals, however the experiment was conducted two other times with similar results. Error bars represent standard deviation.
